# Supplementary material
Source: Research Square preprint supplement (doi:10.21203/rs.3.rs-9619981/v1)
Supplement: Supplementary file 1 [file 750c86cac94447221535bff3.docx]

**Table 2:** Soil sampling locations characteristics

| **Region** | **Locality** | **GPS coordinates** | **Alt.**†  **(m)** | **Agro**  **ecology** | **Soil sampling farm** |
| --- | --- | --- | --- | --- | --- |
| Ashanti  Bono East  Bono  Ahafo  Western North | Asaaman  Akrofonso  Jamase  Mampong  Ninting  Aframso  Tikyakrom  Nkoranza  Bonsu  Fiaso  Oforikrom  Techiman  Agosa  Akrofurom  Wenchi  Tainso  Papakyeay3  Yabraso  Attakrom  Tromeso  Nyameb3kyer3  Wamahinso  Ntotroso  Kenyase  Hwidiem  Wromso  Nkaseim  Adukro  Afamu  Anwiaso  Nkati3so  Asawinso  Awaso  Bekwae | N6°54.668' W1°26.833'  N6°54.850' W1°27.453'  N6°57.777' W1°28.604'  N6°58.963' W1°27.442'  N7°00.444' W1°25.996'  N7°19.377' W1°24.517'  N7°19.263' W1°25.045'  N7°32.674' W1°45.301'  N7°33.260' W1°47.637'  N7°34.961' W1°49.439'  N7°35.173' W1°50.755'  N7°33.533' W1°59.980'  N7°34.365' W2°59.135'  N7°36.113' W2°01.222'  N7°47.362' W2°10.588'  N7°48.400' W2°12.278'  N7°36.113' W2°01.222'  N7°50.310' W2°14.914'  N7°50.373' W2°15.313'  N7°32.628' W2°09.760'  N7°31.372' W2°10.334'  N7°04.779' W2°19.990'  N7°02.372' W2°10.994'  N6°00.119' W2°22.635'  N6°56.976' W2°21.720'  N6°52.936' W2°25.319'  N6°51.204' W2°27.611'  N6°51.204' W2°27.611'  N6°20.005' W2°16.099'  N6°19.488' W2°15.106'  N6°17.869' W2°14.408'  N6°14.576' W2°13.613'  N6°13.604' W2°16.361'  N6°12.240' W2°18.842' | 315  353  304  373  467  170  170  350  288  291  318  351  383  351  194  194  232  220  227  276  276  231  207  224  199  189  187  162  143  140  146  124  145  159 | Forest  Savannah  Transition  Guinea  Savanna  Woodland  Forest  Savannah  Transition  Forest  Forest | *Theobroma cacao*  *Tectona grandis*  *Theobroma cacao*  *Tectona grandis*  *Tectona grandis*  *Mangifera indica*  *Mangifera indica*  *Anacardium occidentale*  *Mangifera indica*  *Anacardium occidentale*  *Theobroma cacao*  *Anacardium occidentale*  *Mangifera indica*  *Tectona grandis*  *Citrus sinensis*  *Citrus sinensis*  *Anacardium occidentale*  *Tectona grandis*  *Mangifera indica*  *Mangifera indica*  *Citrus sinensis*  *Theobroma cacao*  *Tectona grandis*  *Theobroma cacao*  *Theobroma cacao*  *Theobroma cacao*  *Persea americana*  *Theobroma cacao*  *Cocos nucifera*  *Theobroma cacao*  *Theobroma cacao*  *Cocos nucifera*  *Theobroma cacao*  *Elaeis guineensis* |

† Altitude (Height above sea level)
